# Supplementary material for: Stable antiferromagnetism and semiconducting-to-metal transition in ALaCuOsO6 (A = Ba and Sr): strain modulations
Source: Royal Society of Chemistry journal article supplement (doi:10.1039/d2cp04548f), 2022-12-09
Supplement: d2cp04548f1.pdf [file d2cp04548f1.pdf]

## Supporting Information

### Stable Antiferromagnetism and Semiconducting-to-Metal Transition in $ALaCuOsO_6$ ( $A = Ba$ and $Sr$ ): Strain Modulations

S. Nazir<sup>1\*</sup>

<sup>1</sup>*Department of Physics, University of Sargodha, 40100 Sargodha, Pakistan*

Yingchun Cheng<sup>2</sup>

<sup>2</sup>*Key Laboratory of Flexible Electronics and Institute of Advanced Materials,  
Jiangsu National Synergetic Innovation Center for Advanced Materials,  
Nanjing Tech University, 30 South Puzhu Road, Nanjing 211816, China*

---

\* Electronic address: [safdar.nazir@uos.edu.pk](mailto:safdar.nazir@uos.edu.pk), Tel: +92-334-971-9060

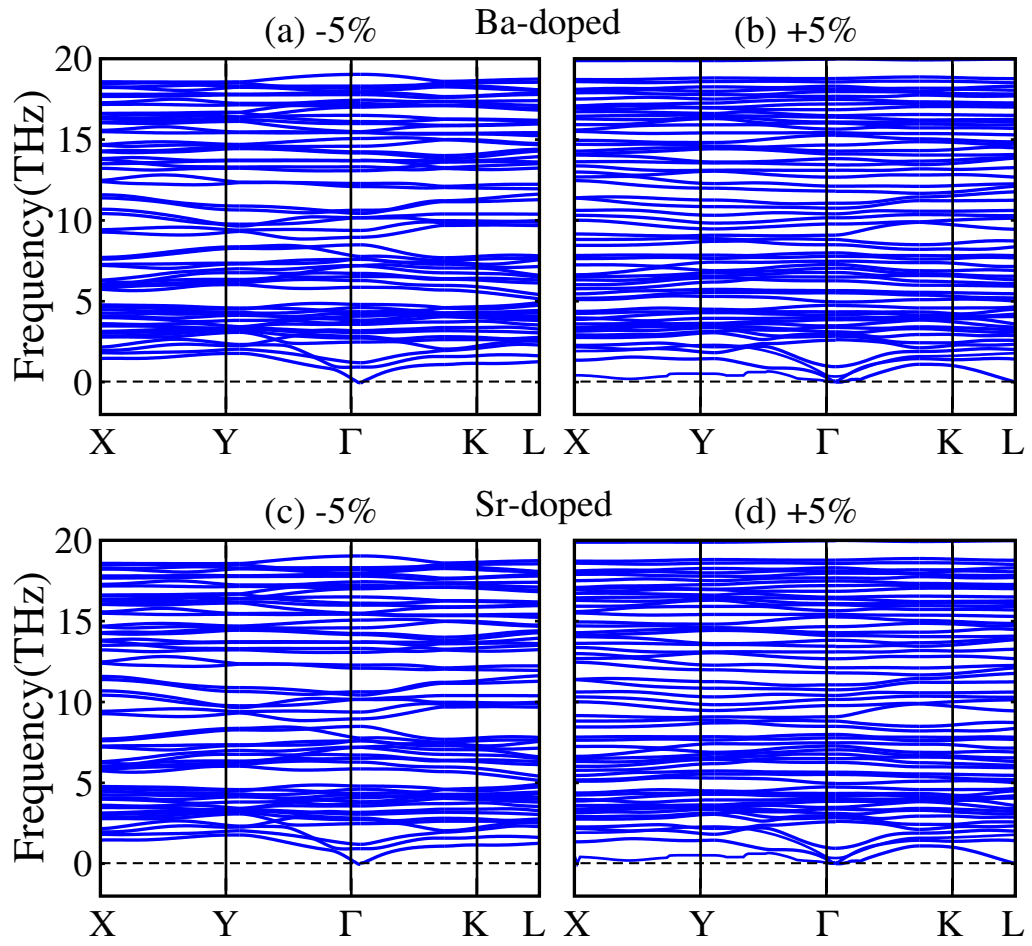

FIG. 1S: (Color line) Calculated phonon dispersion band structures for (a/c)  $-5\%$  and (b/d)  $+5\%$  in Ba- (first row)/Sr- (second row) doped  $\text{La}_2\text{CuOsO}_6$  double perovskite oxides.

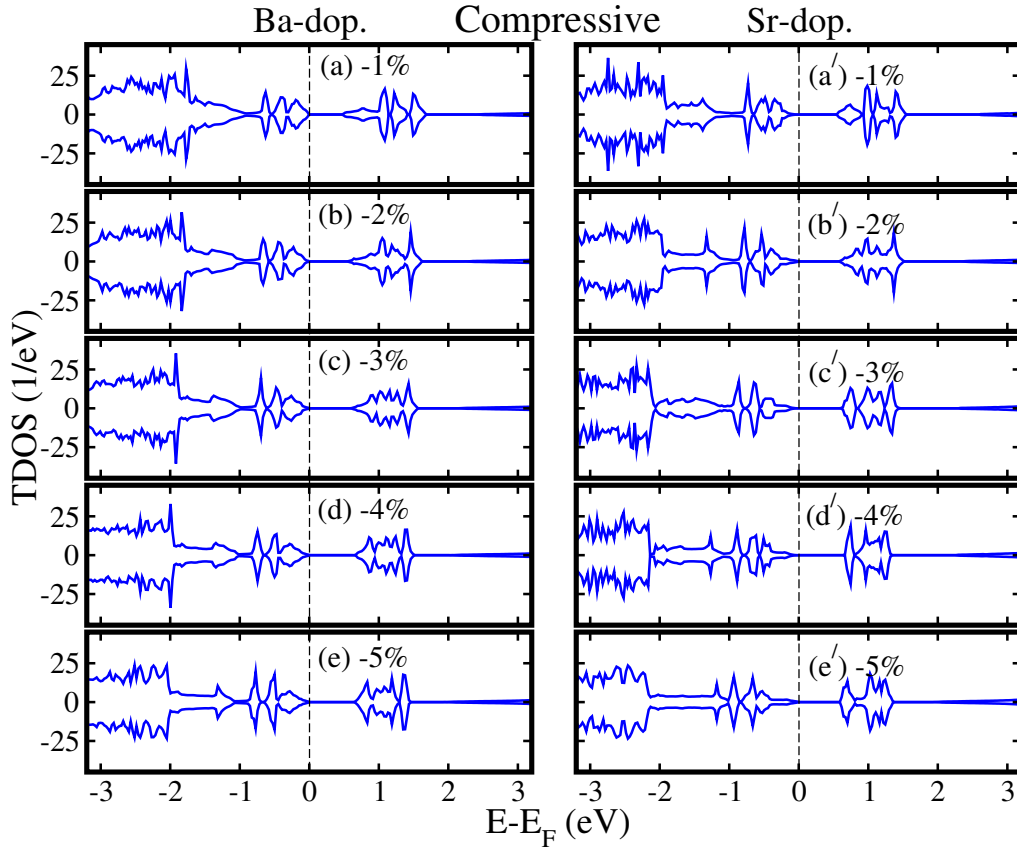

FIG. 2S: (Color line) GGA+ $U$ +SOC calculated spin-polarized total density of states for (a and a') -1%, (b and b') -2%, (c and c') -3%, (d and d') -4%, and (e and e') -5% biaxial compressive strains along the [110]-direction in the most stable antiferromagnetic spin ordering of Ba- (left column) and Sr- (right column) doped  $\text{La}_2\text{CuOsO}_6$  double perovskite oxides.

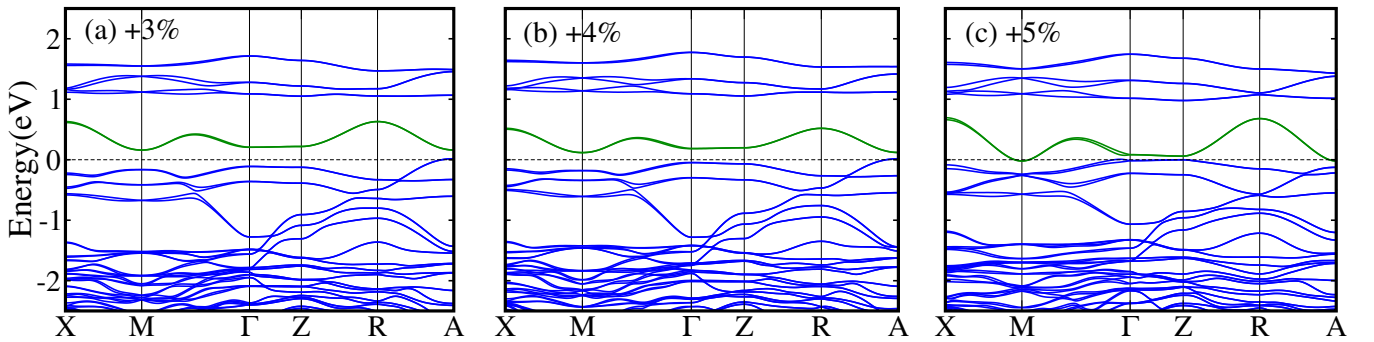

FIG. 3S: (Color online) GGA+ $U$ +SOC calculated spin-polarized band structures for (a) +3%, (a) +4%, and (c) +5% biaxial tensile strains along the [110]-direction in the most stable antiferromagnetic spin ordering of Sr-doped  $\text{La}_2\text{CuOsO}_6$  double perovskite oxide. For clarity, a few bands are highlighted with green colors which are near/at the Fermi level in each case.

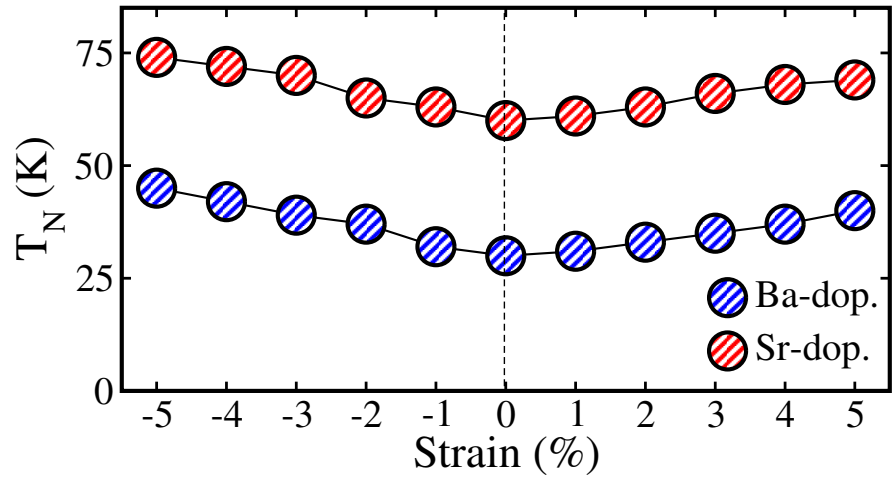

FIG. 4S: (Color line) Calculated Neel temperature ( $T_N$ ) as a function of biaxial strains having ranged from  $-5\%$  to  $+5\%$  along the  $[110]$ -direction in the most stable antiferromagnetic spin ordering of Ba- and Sr-doped  $\text{La}_2\text{CuOsO}_6$  double perovskite oxides.
